# Supplementary material for: Synthesis of rac-(1R,4aR,9aR)-2-methyl-1,3,4,9a-tetrahydro-2H-1,4a-propanobenzofuro[2,3-c]pyridin-6-ol. An unusual double rearrangement leading to the ortho- and para–f oxide-bridged phenylmorphan isomers
Source: Royal Society of Chemistry journal article supplement (doi:10.1039/b312633c), 2004-01-01
Supplement: b312633c.doc [file b312633c.doc]

**Table 1.** Crystal data and structure refinement for **9**.

Empirical formula C15 H20 Cl N O2

Formula weight 281.77

Temperature 295(2) °K

Wavelength 0.71073 Å

Crystal system Orthorhombic

Space group P 212121

Unit cell dimensions a = 7.2507(11) Å = 90°

b = 12.939(2) Å = 90°

c = 15.788(2) Å  = 90°

Volume 1481.1(4) Å3

Z 4

Density (calculated) 1.264 Mg/m3

Absorption coefficient 0.256 mm-1

F(000) 600

Crystal size 0.64 x 0.16 x 0.16 mm3

Theta range for data collection 2.04 to 24.99°

Index ranges -8<=h<=8, -1<=k<=15, -2<=l<=18

Reflections collected 2885

Independent reflections 2517 [R(int) = 0.0138]

Completeness to theta = 24.99° 100.0 %

Absorption correction Integration

Max. and min. transmission 0.967 and 0.946

Refinement method Full-matrix least-squares on F2

Data / restraints / parameters 2517 / 0 / 179

Goodness-of-fit on F2 1.087

Final R indices [I>2sigma(I)] R1 = 0.0453, wR2 = 0.0962

R indices (all data) R1 = 0.0651, wR2 = 0.1151

Extinction coefficient 0.0008(15)

Largest diff. peak and hole 0.191 and -0.159 e.Å-3

**Table 2.** Atomic coordinates ( x 104) and equivalent isotropic displacement parameters (Å2 x 103) for **9**. U(eq) is defined as one third of the trace of the orthogonalized Uij tensor.

______________________________________________________________________________

x y z U(eq)

______________________________________________________________________________

Cl(1) 11002(1) 9071(1) 184(1) 51(1)

C(1) 14992(5) 7764(3) 1452(2) 39(1)

N(2) 14727(4) 8806(2) 1023(2) 39(1)

C(2A) 15968(6) 8955(3) 288(2) 53(1)

C(3) 14705(5) 9738(3) 1594(2) 44(1)

C(4) 13575(6) 9604(3) 2399(2) 45(1)

C(4A) 13827(5) 8540(2) 2793(2) 34(1)

C(4B) 12391(5) 8156(3) 3417(2) 34(1)

C(5) 11454(5) 8605(3) 4089(2) 44(1)

C(6) 10283(5) 7982(3) 4555(2) 51(1)

C(7) 10059(5) 6953(3) 4387(2) 46(1)

C(8) 10998(5) 6490(3) 3704(2) 36(1)

O(8) 10782(4) 5474(2) 3488(2) 50(1)

C(9) 12136(5) 7119(3) 3238(2) 36(1)

O(9) 13121(3) 6791(2) 2528(2) 40(1)

C(9A) 13469(4) 7762(2) 2098(2) 33(1)

C(10) 15747(5) 8374(3) 3195(2) 45(1)

C(11) 17357(5) 8306(3) 2574(3) 53(1)

C(12) 16896(5) 7619(3) 1827(3) 49(1)

______________________________________________________________________________

**Table 3.** Bond lengths [Å] and angles [°] for **9**.

________________________________________­­­­________________________________

C(1)-C(9A) 1.503(5) C(1)-C(12) 1.514(5)

C(1)-N(2) 1.520(4) C(1)-H(1A) 0.9800

N(2)-C(2A) 1.481(5) N(2)-C(3) 1.505(5)

N(2)-H(2) 0.76(4) C(2A)-H(2AA) 0.9600

C(2A)-H(2AB) 0.9600 C(2A)-H(2AC) 0.9600

C(3)-C(4) 1.523(5) C(3)-H(3A) 0.9700

C(3)-H(3B) 0.9700 C(4)-C(4A) 1.521(5)

C(4)-H(4A) 0.9700 C(4)-H(4B) 0.9700

C(4A)-C(9A) 1.511(5) C(4A)-C(4B) 1.517(5)

C(4A)-C(10) 1.546(5) C(4B)-C(9) 1.383(5)

C(4B)-C(5) 1.388(5) C(5)-C(6) 1.383(5)

C(5)-H(5A) 0.9300 C(6)-C(7) 1.368(6)

C(6)-H(6A) 0.9300 C(7)-C(8) 1.408(5)

C(7)-H(7A) 0.9300 C(8)-O(8) 1.367(4)

C(8)-C(9) 1.373(5) O(8)-H(8) 0.94(4)

C(9)-O(9) 1.395(4) O(9)-C(9A) 1.450(4)

C(9A)-H(9AA) 0.9800 C(10)-C(11) 1.527(5)

C(10)-H(10A) 0.9700 C(10)-H(10B) 0.9700

C(11)-C(12) 1.514(6) C(11)-H(11A) 0.9700

C(11)-H(11B) 0.9700 C(12)-H(12A) 0.9700

C(12)-H(12B) 0.9700

C(9A)-C(1)-C(12) 113.8(3) C(9A)-C(1)-N(2) 102.2(3)

C(12)-C(1)-N(2) 113.5(3) C(9A)-C(1)-H(1A) 109.0

C(12)-C(1)-H(1A) 109.0 N(2)-C(1)-H(1A) 109.0

C(2A)-N(2)-C(3) 111.8(3) C(2A)-N(2)-C(1) 112.8(3)

C(3)-N(2)-C(1) 116.5(3) C(2A)-N(2)-H(2) 104(3)

C(3)-N(2)-H(2) 102(3) C(1)-N(2)-H(2) 108(3)

N(2)-C(2A)-H(2AA) 109.5 N(2)-C(2A)-H(2AB) 109.5

H(2AA)-C(2A)-H(2AB) 109.5 N(2)-C(2A)-H(2AC) 109.5

H(2AA)-C(2A)-H(2AC) 109.5 H(2AB)-C(2A)-H(2AC) 109.5

N(2)-C(3)-C(4) 114.5(3) N(2)-C(3)-H(3A) 108.6

C(4)-C(3)-H(3A) 108.6 N(2)-C(3)-H(3B) 108.6

C(4)-C(3)-H(3B) 108.6 H(3A)-C(3)-H(3B) 107.6

C(4A)-C(4)-C(3) 112.3(3) C(4A)-C(4)-H(4A) 109.1

C(3)-C(4)-H(4A) 109.1 C(4A)-C(4)-H(4B) 109.1

C(3)-C(4)-H(4B) 109.1 H(4A)-C(4)-H(4B) 107.9

C(9A)-C(4A)-C(4B) 97.7(3) C(9A)-C(4A)-C(4) 106.7(3)

C(4B)-C(4A)-C(4) 118.7(3) (9A)-C(4A)-C(10) 111.1(3)

C(4B)-C(4A)-C(10) 107.8(3) C(4)-C(4A)-C(10) 113.7(3)

C(9)-C(4B)-C(5) 119.8(3) C(9)-C(4B)-C(4A) 106.1(3)

C(5)-C(4B)-C(4A) 134.0(3) C(6)-C(5)-C(4B) 117.6(4)

C(6)-C(5)-H(5A) 121.2 C(4B)-C(5)-H(5A) 121.2

C(7)-C(6)-C(5) 122.5(4) C(7)-C(6)-H(6A) 118.8

C(5)-C(6)-H(6A) 118.8 C(6)-C(7)-C(8) 120.4(4)

________________________________________­­­­________________________________

**Table 3.** (continued).

________________________________________­­­­________________________________

C(6)-C(7)-H(7A) 119.8 C(8)-C(7)-H(7A) 119.8

O(8)-C(8)-C(9) 120.3(3) O(8)-C(8)-C(7) 123.0(3)

C(9)-C(8)-C(7) 116.6(3) C(8)-O(8)-H(8) 111(3)

C(8)-C(9)-C(4B) 123.1(3) C(8)-C(9)-O(9) 123.9(3)

C(4B)-C(9)-O(9) 113.0(3) C(9)-O(9)-C(9A) 101.6(2)

O(9)-C(9A)-C(1) 116.6(3) O(9)-C(9A)-C(4A) 105.6(3)

C(1)-C(9A)-C(4A) 111.4(3) O(9)-C(9A)-H(9AA) 107.6

C(1)-C(9A)-H(9AA) 107.6 C(4A)-C(9A)-H(9AA) 107.6

C(11)-C(10)-C(4A) 115.6(3) C(11)-C(10)-H(10A) 108.4

C(4A)-C(10)-H(10A) 108.4 C(11)-C(10)-H(10B) 108.4

C(4A)-C(10)-H(10B) 108.4 H(10A)-C(10)-H(10B) 107.4

C(12)-C(11)-C(10) 111.4(3) C(12)-C(11)-H(11A) 109.3

C(10)-C(11)-H(11A) 109.3 C(12)-C(11)-H(11B) 109.3

C(10)-C(11)-H(11B) 109.3 H(11A)-C(11)-H(11B) 108.0

C(1)-C(12)-C(11) 115.7(3) C(1)-C(12)-H(12A) 108.4

C(11)-C(12)-H(12A) 108.4 C(1)-C(12)-H(12B) 108.4

C(11)-C(12)-H(12B) 108.4 H(12A)-C(12)-H(12B) 107.4

________________________________________­­­­________________________________

Symmetry transformations used to generate equivalent atoms:

**Table 4.** Anisotropic displacement parameters (Å2 x 103) for **9**. The anisotropic

displacement factor exponent takes the form: -22[ h2 a*2U11 + ... + 2 h k a* b* U12 ].

______________________________________________________________________________

U11 U22 U33 U23 U13 U12

______________________________________________________________________________

Cl(1) 34(1) 59(1) 61(1) -18(1) -7(1) 7(1)

C(1) 39(2) 31(2) 48(2) 2(2) 9(2) -2(2)

N(2) 26(2) 46(2) 44(2) 6(2) -1(1) 0(1)

C(2A) 38(2) 69(3) 52(2) 14(2) 10(2) -2(2)

C(3) 42(2) 34(2) 56(2) 6(2) -9(2) 0(2)

C(4) 46(2) 33(2) 55(2) -5(2) 3(2) 2(2)

C(4A) 31(2) 33(2) 40(2) 1(2) -2(2) -1(2)

C(4B) 27(2) 41(2) 35(2) -1(2) -1(2) -1(2)

C(5) 46(2) 51(2) 35(2) -9(2) -3(2) 2(2)

C(6) 45(2) 69(3) 38(2) -3(2) 5(2) 7(2)

C(7) 38(2) 62(3) 39(2) 9(2) 10(2) 0(2)

C(8) 27(2) 43(2) 37(2) 6(2) -3(2) 1(2)

O(8) 43(2) 40(2) 67(2) 7(1) 12(2) -4(1)

C(9) 25(2) 42(2) 39(2) 0(2) 1(2) 3(2)

O(9) 37(1) 31(1) 53(2) 0(1) 14(1) -3(1)

C(9A) 27(2) 31(2) 43(2) 6(2) 2(2) 0(2)

C(10) 33(2) 55(2) 46(2) 6(2) -9(2) -9(2)

C(11) 31(2) 64(3) 64(3) 17(2) -8(2) 1(2)

C(12) 34(2) 50(2) 63(3) 20(2) 13(2) 13(2)

______________________________________________________________________________

**Table 5.** Hydrogen coordinates ( x 104) and isotropic displacement parameters (Å2x 10 3)

for **9**.

______________________________________________________________________________

x y z U(eq)

______________________________________________________________________________

H(1A) 14761 7214 1038 47

H(2) 13770(60) 8820(30) 830(20) 47

H(2AA) 15746 9621 41 80

H(2AB) 15734 8427 -126 80

H(2AC) 17227 8912 472 80

H(3A) 14214 10320 1279 53

H(3B) 15964 9905 1749 53

H(4A) 13940 10127 2807 54

H(4B) 12281 9708 2270 54

H(5A) 11608 9300 4221 53

H(6A) 9623 8274 5000 61

H(7A) 9282 6557 4724 56

H(8) 10190(60) 5100(30) 3920(30) 75

H(9AA) 12329 7965 1810 40

H(10A) 15984 8939 3585 53

H(10B) 15713 7742 3525 53

H(11A) 17659 8993 2372 64

H(11B) 18431 8033 2865 64

H(12A) 17800 7742 1385 58

H(12B) 17021 6905 2003 58

______________________________________________________________________________

**Table 6.** Torsion angles [°] for **9**.

________________________________________________________________________

C(9A)-C(1)-N(2)-C(2A) -174.2(3) C(12)-C(1)-N(2)-C(2A) 62.8(4)

C(9A)-C(1)-N(2)-C(3) 54.6(4) C(12)-C(1)-N(2)-C(3) -68.4(4)

C(2A)-N(2)-C(3)-C(4) -175.3(3) C(1)-N(2)-C(3)-C(4) -43.7(4)

N(2)-C(3)-C(4)-C(4A) 40.6(4) C(3)-C(4)-C(4A)-C(9A) -51.9(4)

C(3)-C(4)-C(4A)-C(4B) -160.8(3) C(3)-C(4)-C(4A)-C(10) 70.9(4)

C(9A)-C(4A)-C(4B)-C(9) 26.1(3) C(4)-C(4A)-C(4B)-C(9) 140.0(3)

C(10)-C(4A)-C(4B)-C(9) -89.0(3) C(9A)-C(4A)-C(4B)-C(5) -157.2(4)

C(4)-C(4A)-C(4B)-C(5) -43.3(6) C(10)-C(4A)-C(4B)-C(5) 87.7(5)

C(9)-C(4B)-C(5)-C(6) -0.2(5) C(4A)-C(4B)-C(5)-C(6) -176.6(4)

C(4B)-C(5)-C(6)-C(7) 1.4(6) C(5)-C(6)-C(7)-C(8) -1.7(6)

C(6)-C(7)-C(8)-O(8) -177.8(4) C(6)-C(7)-C(8)-C(9) 0.7(5)

O(8)-C(8)-C(9)-C(4B) 179.0(3) C(7)-C(8)-C(9)-C(4B) 0.5(5)

O(8)-C(8)-C(9)-O(9) 0.5(5) C(7)-C(8)-C(9)-O(9) -178.0(3)

C(5)-C(4B)-C(9)-C(8) -0.8(5) C(4A)-C(4B)-C(9)-C(8) 176.5(3)

C(5)-C(4B)-C(9)-O(9) 177.9(3) C(4A)-C(4B)-C(9)-O(9) -4.8(4)

C(8)-C(9)-O(9)-C(9A) 158.6(3) C(4B)-C(9)-O(9)-C(9A) -20.1(4)

C(9)-O(9)-C(9A)-C(1) 161.5(3) C(9)-O(9)-C(9A)-C(4A) 37.2(3)

C(12)-C(1)-C(9A)-O(9) -67.6(4) N(2)-C(1)-C(9A)-O(9) 169.6(3)

C(12)-C(1)-C(9A)-C(4A) 53.6(4) N(2)-C(1)-C(9A)-C(4A) -69.2(3)

C(4B)-C(4A)-C(9A)-O(9) -38.8(3) C(4)-C(4A)-C(9A)-O(9) -161.9(3)

C(10)-C(4A)-C(9A)-O(9) 73.7(3) C(4B)-C(4A)-C(9A)-C(1) -166.3(3)

C(4)-C(4A)-C(9A)-C(1) 70.6(4) C(10)-C(4A)-C(9A)-C(1) -53.8(4)

C(9A)-C(4A)-C(10)-C(11) 51.0(4) C(4B)-C(4A)-C(10)-C(11) 157.0(3)

C(4)-C(4A)-C(10)-C(11) -69.3(4) C(4A)-C(10)-C(11)-C(12) -44.8(5)

C(9A)-C(1)-C(12)-C(11) -49.0(4) N(2)-C(1)-C(12)-C(11) 67.3(4)

C(10)-C(11)-C(12)-C(1) 43.2(4)

________________________________________________________________________

**Table 7.** Crystal data and structure refinement for **10**.

Empirical formula C15 H20 Br N O2

Formula weight 326.23

Temperature 293(2) °K

Wavelength 0.71073 Å

Crystal system Triclinic

Space group P -1

Unit cell dimensions a = 10.841(2) Å = 103.14(2)°

b = 11.998(3) Å = 97.91(2)°

c = 12.157(3) Å  = 103.65(2)°

Volume 1465.5(6) Å3

Z 4

Density (calculated) 1.479 Mg/m3

Absorption coefficient 2.803 mm-1

F(000) 672

Crystal size 0.56 x 0.22 x 0.09 mm3

Theta range for data collection 1.81 to 25.05°

Index ranges -12<=h<=12, -14<=k<=13, 0<=l<=14

Reflections collected 5233

Independent reflections 4895 [R(int) = 0.0264]

Completeness to theta = 25.05° 94.2 %

Absorption correction Psi-scan

Max. and min. transmission 0.870 and 0.616

Refinement method Full-matrix least-squares on F2

Data / restraints / parameters 4895 / 0 / 343

Goodness-of-fit on F2 1.110

Final R indices [I>2sigma(I)] R1 = 0.0754, wR2 = 0.1702

R indices (all data) R1 = 0.1402, wR2 = 0.2017

Largest diff. peak and hole 0.828 and -0.497 e.Å-3

**Table 8.** Atomic coordinates ( x 104) and equivalent isotropic displacement parameters (Å2 x 103) for **10**. U(eq) is defined as one third of the trace of the orthogonalized Uij tensor.

______________________________________________________________________________

x y z U(eq)

______________________________________________________________________________

Br(1) -3857(1) 4948(1) 2618(1) 55(1)

C(1) 3751(10) 1962(8) 1260(8) 45(2)

N(2) 4582(7) 2636(7) 570(6) 40(2)

C(2A) 5567(10) 2021(9) 197(9) 54(3)

C(3) 3887(10) 2917(9) -451(8) 48(3)

C(4) 2710(10) 3368(9) -236(8) 47(3)

C(4A) 1890(9) 2658(8) 444(7) 37(2)

C(4B) 933(9) 3175(8) 1041(7) 36(2)

C(5) -14(9) 3675(8) 693(8) 42(2)

C(6) -852(9) 3944(8) 1422(8) 39(2)

O(6) -1760(7) 4472(7) 1037(7) 67(2)

C(7) -748(10) 3686(10) 2477(9) 57(3)

C(8) 231(11) 3194(10) 2851(9) 59(3)

C(9) 1048(10) 2957(8) 2128(8) 45(2)

O(9) 2067(7) 2448(6) 2352(5) 52(2)

C(9A) 2850(9) 2735(8) 1534(7) 38(2)

C(10) 1164(11) 1362(9) -219(9) 57(3)

C(11) 2024(10) 517(9) -445(10) 56(3)

C(12) 3012(11) 686(9) 644(10) 58(3)

Br(2) -3987(1) 618(1) 2679(1) 54(1)

C(1') 4102(12) -1763(10) 4083(9) 59(3)

N(2') 4102(9) -2477(8) 4990(7) 51(2)

C(2A') 5269(12) -2905(11) 5151(10) 76(4)

C(3') 2894(12) -3496(11) 4785(10) 67(3)

C(4') 1589(13) -3180(11) 4544(10) 72(4)

C(4A') 1610(11) -2451(9) 3698(9) 52(3)

C(4B') 672(11) -1711(10) 3641(8) 53(3)

C(5') -717(12) -2026(10) 3598(9) 68(3)

C(6') -1293(11) -1095(11) 3465(9) 59(3)

O(6') -2599(8) -1358(8) 3465(8) 84(3)

C(7') -632(11) -31(11) 3353(9) 61(3)

C(8') 708(13) 226(11) 3385(10) 69(3)

C(9') 1266(11) -661(10) 3509(9) 57(3)

O(9') 2635(7) -521(6) 3577(6) 60(2)

C(9A') 2842(11) -1410(9) 4137(9) 55(3)

C(10') 1636(13) -3110(11) 2440(9) 69(3)

C(11') 2827(13) -3513(10) 2272(9) 66(3)

C(12') 4052(13) -2521(11) 2821(10) 70(3)

______________________________________________________________________________

**Table 9.** Bond lengths [Å] and angles [°] for **10**.

__________________________________________________________________________

C(1)-C(12) 1.510(14) C(1)-C(9A) 1.518(11)

C(1)-N(2) 1.530(11) C(1)-H(1A) 0.9800

N(2)-C(2A) 1.497(11) N(2)-C(3) 1.509(11)

C(2A)-H(2AA) 0.9600 C(2A)-H(2AB) 0.9600

C(2A)-H(2AC) 0.9600 C(3)-C(4) 1.529(12)

C(3)-H(3A) 0.9700 C(3)-H(3B) 0.9700

C(4)-C(4A) 1.538(12) C(4)-H(4A) 0.9700

C(4)-H(4B) 0.9700 C(4A)-C(4B) 1.515(12)

C(4A)-C(9A) 1.539(12) C(4A)-C(10) 1.537(13)

C(4B)-C(5) 1.371(12) C(4B)-C(9) 1.399(12)

C(5)-C(6) 1.395(12) C(5)-H(5A) 0.9300

C(6)-O(6) 1.376(10) C(6)-C(7) 1.382(13)

O(6)-H(6) 0.8200 C(7)-C(8) 1.402(14)

C(7)-H(7A) 0.9300 C(8)-C(9) 1.363(13)

C(8)-H(8A) 0.9300 C(9)-O(9) 1.406(11)

O(9)-C(9A) 1.442(10) C(9A)-H(9AA) 0.9800

C(10)-C(11) 1.538(13) C(10)-H(10A) 0.9700

C(10)-H(10B) 0.9700 C(11)-C(12) 1.526(15)

C(11)-H(11A) 0.9700 C(11)-H(11B) 0.9700

C(12)-H(12A) 0.9700 C(12)-H(12B) 0.9700

C(1')-C(9A') 1.528(14) C(1')-N(2') 1.543(12)

C(1')-C(12') 1.582(14) C(1')-H(1'A) 0.9800

N(2')-C(2A') 1.479(12) N(2')-C(3') 1.513(15)

C(2A')-H(2AD) 0.9600 C(2A')-H(2AE) 0.9600

C(2A')-H(2AF) 0.9600 C(3')-C(4') 1.555(16)

C(3')-H(3'A) 0.9700 C(3')-H(3'B) 0.9700

C(4')-C(4A') 1.493(14) C(4')-H(4'A) 0.9700

C(4')-H(4'B) 0.9700 C(4A')-C(4B') 1.504(14)

C(4A')-C(9A') 1.531(15) C(4A')-C(10') 1.562(14)

C(4B')-C(9') 1.329(15) C(4B')-C(5') 1.454(15)

C(5')-C(6') 1.430(15) C(5')-H(5'A) 0.9700

C(5')-H(5'B) 0.9700 C(6')-C(7') 1.355(15)

C(6')-O(6') 1.376(13) O(6')-H(6') 0.8200

C(7')-C(8') 1.404(16) C(7')-H(7'A) 0.9300

C(8')-C(9') 1.369(15) C(8')-H(8'A) 0.9300

C(9')-O(9') 1.442(13) O(9')-C(9A') 1.433(11)

C(9A')-H(9AB) 0.9800 C(10')-C(11') 1.505(16)

C(10')-H(10C) 0.9300 C(11')-C(12') 1.508(16)

C(11')-H(11C) 0.9700 C(11')-H(11D) 0.9700

C(12')-H(12C) 0.9700 C(12')-H(12D) 0.9700

C(12)-C(1)-C(9A) 111.9(9) C(12)-C(1)-N(2) 115.8(8)

C(9A)-C(1)-N(2) 101.4(7) C(12)-C(1)-H(1A) 109.1

C(9A)-C(1)-H(1A) 109.1 N(2)-C(1)-H(1A) 109.1

C(2A)-N(2)-C(3) 109.2(7) C(2A)-N(2)-C(1) 111.0(7)

C(3)-N(2)-C(1) 117.5(7) N(2)-C(2A)-H(2AA) 109.5

__________________________________________________________________________

**Table 9.** (continued).

__________________________________________________________________________

N(2)-C(2A)-H(2AB) 109.5 H(2AA)-C(2A)-H(2AB) 109.5

N(2)-C(2A)-H(2AC) 109.5 H(2AA)-C(2A)-H(2AC) 109.5

H(2AB)-C(2A)-H(2AC) 109.5 N(2)-C(3)-C(4) 114.5(7)

N(2)-C(3)-H(3A) 108.6 C(4)-C(3)-H(3A) 108.6

N(2)-C(3)-H(3B) 108.6 C(4)-C(3)-H(3B) 108.6

H(3A)-C(3)-H(3B) 107.6 C(3)-C(4)-C(4A) 111.8(7)

C(3)-C(4)-H(4A) 109.3 C(4A)-C(4)-H(4A) 109.3

C(3)-C(4)-H(4B) 109.3 C(4A)-C(4)-H(4B) 109.3

H(4A)-C(4)-H(4B) 107.9 C(4B)-C(4A)-C(9A) 97.6(7)

C(4B)-C(4A)-C(10) 106.5(8) C(9A)-C(4A)-C(10) 112.0(7)

C(4B)-C(4A)-C(4) 119.5(7) C(9A)-C(4A)-C(4) 104.8(8)

C(10)-C(4A)-C(4) 115.0(8) C(5)-C(4B)-C(9) 119.2(8)

C(5)-C(4B)-C(4A) 133.5(8) C(9)-C(4B)-C(4A) 107.0(7)

C(4B)-C(5)-C(6) 119.4(8) C(4B)-C(5)-H(5A) 120.3

C(6)-C(5)-H(5A) 120.3 O(6)-C(6)-C(7) 122.9(9)

O(6)-C(6)-C(5) 116.7(8) C(7)-C(6)-C(5) 120.4(8)

C(6)-O(6)-H(6) 109.5 C(6)-C(7)-C(8) 120.6(9)

C(6)-C(7)-H(7A) 119.7 C(8)-C(7)-H(7A) 119.7

C(9)-C(8)-C(7) 117.7(9) C(9)-C(8)-H(8A) 121.2

C(7)-C(8)-H(8A) 121.2 C(8)-C(9)-C(4B) 122.6(9)

C(8)-C(9)-O(9) 125.4(9) C(4B)-C(9)-O(9) 112.0(8)

C(9)-O(9)-C(9A) 102.8(6) O(9)-C(9A)-C(1) 115.4(7)

O(9)-C(9A)-C(4A) 105.7(7) C(1)-C(9A)-C(4A) 111.4(7)

O(9)-C(9A)-H(9AA) 108.0 C(1)-C(9A)-H(9AA) 108.0

C(4A)-C(9A)-H(9AA) 108.0 C(11)-C(10)-C(4A) 115.3(9)

C(11)-C(10)-H(10A) 108.5 C(4A)-C(10)-H(10A) 108.5

C(11)-C(10)-H(10B) 108.5 C(4A)-C(10)-H(10B) 108.5

H(10A)-C(10)-H(10B) 107.5 C(12)-C(11)-C(10) 110.7(8)

C(12)-C(11)-H(11A) 109.5 C(10)-C(11)-H(11A) 109.5

C(12)-C(11)-H(11B) 109.5 C(10)-C(11)-H(11B) 109.5

H(11A)-C(11)-H(11B) 108.1 C(1)-C(12)-C(11) 115.3(8)

C(1)-C(12)-H(12A) 108.4 C(11)-C(12)-H(12A) 108.4

C(1)-C(12)-H(12B) 108.4 C(11)-C(12)-H(12B) 108.4

H(12A)-C(12)-H(12B) 107.5 C(9A')-C(1')-N(2') 101.1(8)

C(9A')-C(1')-C(12') 110.0(9) N(2')-C(1')-C(12') 113.8(8)

C(9A')-C(1')-H(1'A) 110.5 N(2')-C(1')-H(1'A) 110.5

C(12')-C(1')-H(1'A) 110.5 C(2A')-N(2')-C(3') 110.1(9)

C(2A')-N(2')-C(1') 112.9(8) C(3')-N(2')-C(1') 114.4(8)

N(2')-C(2A')-H(2AD) 109.5 N(2')-C(2A')-H(2AE) 109.5

H(2AD)-C(2A')-H(2AE) 109.5 N(2')-C(2A')-H(2AF) 109.5

H(2AD)-C(2A')-H(2AF) 109.5 H(2AE)-C(2A')-H(2AF) 109.5

N(2')-C(3')-C(4') 115.5(9) N(2')-C(3')-H(3'A) 108.4

C(4')-C(3')-H(3'A) 108.4 N(2')-C(3')-H(3'B) 108.4

C(4')-C(3')-H(3'B) 108.4 H(3'A)-C(3')-H(3'B) 107.5

C(4A')-C(4')-C(3') 111.1(10) C(4A')-C(4')-H(4'A) 109.4

C(3')-C(4')-H(4'A) 109.4 C(4A')-C(4')-H(4'B) 109.4

__________________________________________________________________________

**Table 9.** (continued).

__________________________________________________________________________

C(3')-C(4')-H(4'B) 109.4 H(4'A)-C(4')-H(4'B) 108.0

C(4')-C(4A')-C(4B') 119.6(9) C(4')-C(4A')-C(9A') 107.0(9)

C(4B')-C(4A')-C(9A') 96.6(8) C(4')-C(4A')-C(10') 115.6(9)

C(4B')-C(4A')-C(10') 108.3(8) C(9A')-C(4A')-C(10') 107.4(9)

C(9')-C(4B')-C(5') 119.8(10) C(9')-C(4B')-C(4A') 109.8(10)

C(5')-C(4B')-C(4A') 130.1(10) C(6')-C(5')-C(4B') 113.5(11)

C(6')-C(5')-H(5'A) 108.9 C(4B')-C(5')-H(5'A) 108.9

C(6')-C(5')-H(5'B) 108.9 C(4B')-C(5')-H(5'B) 108.9

H(5'A)-C(5')-H(5'B) 107.7 C(7')-C(6')-O(6') 121.5(10)

C(7')-C(6')-C(5') 124.0(12) O(6')-C(6')-C(5') 114.5(11)

C(6')-O(6')-H(6') 109.5 C(6')-C(7')-C(8') 120.4(12)

C(6')-C(7')-H(7'A) 119.8 C(8')-C(7')-H(7'A) 119.8

C(9')-C(8')-C(7') 116.0(12) C(9')-C(8')-H(8'A) 122.0

C(7')-C(8')-H(8'A) 122.0 C(4B')-C(9')-C(8') 126.3(12)

C(4B')-C(9')-O(9') 111.3(10) C(8')-C(9')-O(9') 122.4(11)

C(9A')-O(9')-C(9') 101.9(8) O(9')-C(9A')-C(1') 117.3(8)

O(9')-C(9A')-C(4A') 106.0(8) C(1')-C(9A')-C(4A') 114.6(9)

O(9')-C(9A')-H(9AB) 106.0 C(1')-C(9A')-H(9AB) 106.0

C(4A')-C(9A')-H(9AB) 106.0 C(11')-C(10')-C(4A') 116.3(9)

C(11')-C(10')-H(10C) 121.8 C(4A')-C(10')-H(10C) 121.8

C(12')-C(11')-C(10') 111.7(9) C(12')-C(11')-H(11C) 109.3

C(10')-C(11')-H(11C) 109.3 C(12')-C(11')-H(11D) 109.3

C(10')-C(11')-H(11D) 109.3 H(11C)-C(11')-H(11D) 107.9

C(11')-C(12')-C(1') 115.8(10) C(11')-C(12')-H(12C) 108.3

C(1')-C(12')-H(12C) 108.3 C(11')-C(12')-H(12D) 108.3

C(1')-C(12')-H(12D) 108.3 H(12C)-C(12')-H(12D) 107.4__________________________________________________________________________

__________________________________________________________________________

Symmetry transformations used to generate equivalent atoms:

**Table 10.** Anisotropic displacement parameters (Å2 x 103) for **10**. The anisotropic

displacement factor exponent takes the form: -22[ h2 a*2U11 + ... + 2 h k a* b* U12 ].0

______________________________________________________________________________

U11 U22 U33 U23 U13 U12

______________________________________________________________________________

Br(1) 50(1) 52(1) 61(1) 1(1) 20(1) 17(1)

C(1) 54(7) 55(6) 51(6) 28(5) 32(5) 37(5)

N(2) 34(4) 57(5) 44(4) 22(4) 19(4) 28(4)

C(2A) 56(7) 69(7) 56(6) 18(6) 33(6) 41(6)

C(3) 56(7) 52(6) 50(6) 23(5) 26(5) 24(5)

C(4) 58(7) 55(6) 46(6) 26(5) 24(5) 29(5)

C(4A) 49(6) 37(5) 39(5) 15(4) 18(5) 27(5)

C(4B) 39(5) 38(5) 34(5) 10(4) 12(4) 15(4)

C(5) 50(6) 44(5) 38(5) 13(4) 12(5) 20(5)

C(6) 30(5) 39(5) 51(6) 11(5) 10(5) 14(4)

O(6) 59(5) 96(6) 81(5) 46(5) 40(4) 55(5)

C(7) 55(7) 75(8) 64(7) 31(6) 38(6) 32(6)

C(8) 72(8) 81(8) 59(7) 40(6) 46(6) 46(7)

C(9) 53(7) 40(5) 56(6) 24(5) 22(5) 25(5)

O(9) 66(5) 74(5) 49(4) 37(4) 36(4) 49(4)

C(9A) 39(6) 46(5) 39(5) 17(4) 18(4) 19(5)

C(10) 59(7) 48(6) 61(7) -4(5) 22(6) 20(5)

C(11) 40(6) 40(6) 78(8) -7(5) 18(6) 12(5)

C(12) 65(8) 53(7) 83(8) 32(6) 45(7) 37(6)

Br(2) 62(1) 69(1) 39(1) 10(1) 12(1) 40(1)

C(1') 84(9) 63(7) 52(6) 25(6) 41(6) 37(6)

N(2') 61(6) 62(6) 42(5) 18(4) 11(4) 36(5)

C(2A') 77(9) 100(10) 75(8) 25(7) 18(7) 70(8)

C(3') 90(10) 74(8) 52(7) 19(6) 27(7) 43(8)

C(4') 106(11) 77(8) 55(7) 20(6) 45(7) 46(8)

C(4A') 55(7) 48(6) 53(6) 10(5) 12(5) 17(6)

C(4B') 62(8) 58(7) 38(6) 6(5) 3(5) 29(6)

C(5') 74(9) 73(8) 37(6) -11(6) -7(6) 18(7)

C(6') 47(7) 79(8) 53(7) 9(6) -2(6) 34(7)

O(6') 60(6) 99(7) 95(7) 27(5) 11(5) 26(5)

C(7') 46(7) 70(8) 55(7) 9(6) 7(6) 4(6)

C(8') 82(10) 63(8) 66(8) 20(6) 16(7) 24(7)

C(9') 55(7) 65(8) 48(6) 9(6) 10(6) 18(6)

O(9') 59(5) 61(5) 70(5) 23(4) 23(4) 22(4)

C(9A') 84(9) 65(7) 45(6) 29(5) 31(6) 49(7)

C(10') 82(9) 87(9) 34(6) -5(6) 2(6) 43(7)

C(11') 100(10) 55(7) 40(6) 2(5) 22(6) 21(7)

C(12') 88(10) 80(8) 58(7) 21(6) 32(7) 42(8)

______________________________________________________________________________

**Table 11.** Hydrogen coordinates ( x 104) and isotropic displacement parameters (Å2x 10 3)

for **10**.

______________________________________________________________________________

x y z U(eq)

______________________________________________________________________________

H(1A) 4301 1983 1979 54

H(2AA) 6067 2454 -242 80

H(2AB) 5134 1227 -270 80

H(2AC) 6131 1990 864 80

H(3A) 3604 2204 -1093 57

H(3B) 4495 3516 -676 57

H(4A) 2178 3303 -970 56

H(4B) 3003 4202 191 56

H(5A) -97 3833 -24 50

H(6) -2202 4596 1523 80

H(7A) -1333 3840 2944 69

H(8A) 320 3036 3568 71

H(9AA) 3380 3563 1845 45

H(10A) 539 1051 213 69

H(10B) 684 1360 -954 69

H(11A) 1486 -301 -698 67

H(11B) 2473 672 -1055 67

H(12A) 2564 339 1176 70

H(12B) 3630 247 440 70

H(1'A) 4847 -1053 4318 70

H(2AD) 5216 -3349 5716 113

H(2AE) 6027 -2236 5410 113

H(2AF) 5321 -3408 4432 113

H(3'A) 2917 -3805 5456 80

H(3'B) 2914 -4128 4134 80

H(4'A) 886 -3909 4242 87

H(4'B) 1431 -2740 5260 87

H(5'A) -1132 -2727 2959 82

H(5'B) -879 -2230 4303 82

H(6') -2990 -1291 2867 101

H(7'A) -1067 532 3254 73

H(8'A) 1186 955 3325 83

H(9AB) 2864 -1076 4956 66

H(10C) 953 -3246 1828 83

H(11C) 2831 -4172 2607 79

H(11D) 2802 -3793 1453 79

H(12C) 4170 -1985 2330 84

H(12D) 4779 -2863 2843 84

______________________________________________________________________________

**Table 12.** Torsion angles [°] for **10**.

__________________________________________________________________________

C(12)-C(1)-N(2)-C(2A) -58.7(11) C(9A)-C(1)-N(2)-C(2A) -180.0(8)

C(12)-C(1)-N(2)-C(3) 68.1(10) C(9A)-C(1)-N(2)-C(3) -53.2(10)

C(2A)-N(2)-C(3)-C(4) 170.8(9) C(1)-N(2)-C(3)-C(4) 43.2(11)

N(2)-C(3)-C(4)-C(4A) -42.2(12) C(3)-C(4)-C(4A)-C(4B) 162.2(8)

C(3)-C(4)-C(4A)-C(9A) 54.4(10) C(3)-C(4)-C(4A)-C(10) -69.1(11)

C(9A)-C(4A)-C(4B)-C(5) 160.7(11) C(10)-C(4A)-C(4B)-C(5) -83.5(13)

C(4)-C(4A)-C(4B)-C(5) 49.0(15) C(9A)-C(4A)-C(4B)-C(9) -25.6(9)

C(10)-C(4A)-C(4B)-C(9) 90.2(9) C(4)-C(4A)-C(4B)-C(9) -137.3(9)

C(9)-C(4B)-C(5)-C(6) -0.8(14) C(4A)-C(4B)-C(5)-C(6) 172.3(9)

C(4B)-C(5)-C(6)-O(6) 178.4(9) C(4B)-C(5)-C(6)-C(7) -1.4(15)

O(6)-C(6)-C(7)-C(8) -177.2(10) C(5)-C(6)-C(7)-C(8) 2.5(16)

C(6)-C(7)-C(8)-C(9) -1.5(17) C(7)-C(8)-C(9)-C(4B) -0.7(17)

C(7)-C(8)-C(9)-O(9) -178.9(10) C(5)-C(4B)-C(9)-C(8) 1.8(15)

C(4A)-C(4B)-C(9)-C(8) -173.0(10) C(5)-C(4B)-C(9)-O(9) -179.8(9)

C(4A)-C(4B)-C(9)-O(9) 5.5(11) C(8)-C(9)-O(9)-C(9A) -162.5(10)

C(4B)-C(9)-O(9)-C(9A) 19.1(10) C(9)-O(9)-C(9A)-C(1) -159.4(8)

C(9)-O(9)-C(9A)-C(4A) -35.8(9) C(12)-C(1)-C(9A)-O(9) 65.8(11)

N(2)-C(1)-C(9A)-O(9) -170.2(7) C(12)-C(1)-C(9A)-C(4A) -54.7(10)

N(2)-C(1)-C(9A)-C(4A) 69.4(9) C(4B)-C(4A)-C(9A)-O(9) 37.6(8)

C(10)-C(4A)-C(9A)-O(9) -73.7(9) C(4)-C(4A)-C(9A)-O(9) 160.9(7)

C(4B)-C(4A)-C(9A)-C(1) 163.6(7) C(10)-C(4A)-C(9A)-C(1) 52.3(10)

C(4)-C(4A)-C(9A)-C(1) -73.1(9) C(4B)-C(4A)-C(10)-C(11) -154.6(9)

C(9A)-C(4A)-C(10)-C(11) -49.0(12) C(4)-C(4A)-C(10)-C(11) 70.5(12)

C(4A)-C(10)-C(11)-C(12) 45.8(13) C(9A)-C(1)-C(12)-C(11) 54.1(11)

N(2)-C(1)-C(12)-C(11) -61.4(11) C(10)-C(11)-C(12)-C(1) -48.4(12)

C(9A')-C(1')-N(2')-C(2A') -178.0(9) C(12')-C(1')-N(2')-C(2A') 64.1(13)

C(9A')-C(1')-N(2')-C(3') 55.1(10) C(12')-C(1')-N(2')-C(3') -62.8(12)

C(2A')-N(2')-C(3')-C(4') -177.3(9) C(1')-N(2')-C(3')-C(4') -48.9(11)

N(2')-C(3')-C(4')-C(4A') 45.4(13) C(3')-C(4')-C(4A')-C(4B') -159.4(10)

C(3')-C(4')-C(4A')-C(9A') -51.2(12) C(3')-C(4')-C(4A')-C(10') 68.4(13)

C(4')-C(4A')-C(4B')-C(9') 139.1(11) C(9A')-C(4A')-C(4B')-C(9') 25.3(10)

C(10')-C(4A')-C(4B')-C(9') -85.5(11) C(4')-C(4A')-C(4B')-C(5') -47.4(16)

C(9A')-C(4A')-C(4B')-C(5') -161.2(10) C(10')-C(4A')-C(4B')-C(5') 88.0(13)

C(9')-C(4B')-C(5')-C(6') -2.8(14) C(4A')-C(4B')-C(5')-C(6') -175.8(10)

C(4B')-C(5')-C(6')-C(7') 2.0(16) C(4B')-C(5')-C(6')-O(6') -177.7(9)

O(6')-C(6')-C(7')-C(8') 178.4(10) C(5')-C(6')-C(7')-C(8') -1.3(17)

C(6')-C(7')-C(8')-C(9') 1.3(16) C(5')-C(4B')-C(9')-C(8') 3.4(17)

C(4A')-C(4B')-C(9')-C(8') 177.6(10) C(5')-C(4B')-C(9')-O(9') -179.9(9)

C(4A')-C(4B')-C(9')-O(9') -5.6(12) C(7')-C(8')-C(9')-C(4B') -2.5(17)

C(7')-C(8')-C(9')-O(9') -178.9(9) C(4B')-C(9')-O(9')-C(9A') -18.6(11)

C(8')-C(9')-O(9')-C(9A') 158.3(10) C(9')-O(9')-C(9A')-C(1') 164.3(9)

C(9')-O(9')-C(9A')-C(4A') 34.9(9) N(2')-C(1')-C(9A')-O(9') 167.4(9)

C(12')-C(1')-C(9A')-O(9') -72.0(12) N(2')-C(1')-C(9A')-C(4A') -67.3(10)

C(12')-C(1')-C(9A')-C(4A') 53.3(11) C(4')-C(4A')-C(9A')-O(9') -160.3(8)

C(4B')-C(4A')-C(9A')-O(9') -36.6(9) C(10')-C(4A')-C(9A')-O(9') 75.0(9)

C(4')-C(4A')-C(9A')-C(1') 68.7(10) C(4B')-C(4A')-C(9A')-C(1') -167.6(8)

__________________________________________________________________________

**Table 12** (continued).

__________________________________________________________________________

C(10')-C(4A')-C(9A')-C(1') -56.0(11) C(4')-C(4A')-C(10')-C(11') -65.0(15)

C(4B')-C(4A')-C(10')-C(11') 157.7(10) C(9A')-C(4A')-C(10')-C(11') 54.3(12)

C(4A')-C(10')-C(11')-C(12') -50.0(14) C(10')-C(11')-C(12')-C(1') 45.4(13)

C(9A')-C(1')-C(12')-C(11') -47.1(13) N(2')-C(1')-C(12')-C(11') 65.5(13)

__________________________________________________________________________

**Table 13.** Crystal data and structure refinement for **19**.

Empirical formula C17 H27 Cl2 N O3

Formula weight 364.30

Temperature 295(2) °K

Wavelength 0.71073 Å

Crystal system Monoclinic

Space group P 21

Unit cell dimensions a = 6.5210(10) Å = 90°

b = 8.1870(10) Å = 92.720(10)°.

c = 17.336(2) Å  = 90°.

Volume 924.5(2) Å3

Z 2

Density (calculated) 1.309 Mg/m3

Absorption coefficient 0.365 mm-1

F(000) 388

Crystal size 0.56 x 0.48 x 0.35 mm3

Theta range for data collection 2.35 to 25.05°

Index ranges 0<=h<=7, 0<=k<=9, -20<=l<=20

Reflections collected 1989

Independent reflections 1767 [R(int) = 0.0128]

Completeness to theta = 25.05° 99.9 %

Absorption correction Psi-scan

Max. and min. transmission 0.787 and 0.748

Refinement method Full-matrix least-squares on F2

Data / restraints / parameters 1767 / 1 / 214

Goodness-of-fit on F2 1.091

Final R indices [I>2sigma(I)] R1 = 0.0310, wR2 = 0.0863

R indices (all data) R1 = 0.0337, wR2 = 0.0888

Absolute structure parameter 0.19(8)

Largest diff. peak and hole 0.229 and -0.161 e.Å-3

**Table 14.** Atomic coordinates ( x 104) and equivalent isotropic displacement parameters (Å2 x 103) for **19**. U(eq) is defined as one third of the trace of the orthogonalized Uij tensor.

______________________________________________________________________________

x y z U(eq)

______________________________________________________________________________

N(1) 10051(4) 6992(3) 3847(1) 40(1)

C(1A) 8190(5) 6725(5) 4302(2) 57(1)

C(1) 10939(5) 8687(5) 3964(2) 52(1)

C(2) 12220(5) 9004(4) 3268(2) 46(1)

C(3) 11669(4) 7621(4) 2664(2) 34(1)

C(1') 11292(4) 8353(4) 1851(2) 35(1)

C(2') 9742(4) 9501(4) 1693(2) 40(1)

O(2') 8566(3) 9950(3) 2299(1) 53(1)

C(2'A) 6718(5) 10823(5) 2136(2) 55(1)

C(3') 9453(4) 10178(5) 965(2) 49(1)

C(4') 10689(5) 9728(4) 372(2) 49(1)

C(5') 12257(4) 8623(4) 518(2) 39(1)

O(5') 13450(3) 8276(3) -95(1) 52(1)

C(5'A) 15229(6) 7306(6) 45(3) 63(1)

C(6') 12554(4) 7946(3) 1252(2) 36(1)

C(4) 13405(4) 6349(4) 2721(2) 39(1)

C(5) 12857(5) 4671(4) 2379(2) 44(1)

C(6) 11030(5) 3950(4) 2776(2) 44(1)

C(7) 9204(4) 5090(4) 2736(1) 37(1)

Cl(7) 8139(1) 5198(1) 1752(1) 44(1)

C(8) 9690(4) 6851(4) 2983(2) 34(1)

Cl(2) 14092(2) 7563(2) 5907(1) 75(1)

O(1S) 12789(4) 5101(5) 4656(2) 68(1)

______________________________________________________________________________

**Table 15.** Bond lengths [Å] and angles [°] for 19.

________________________________________________________________________

N(1)-C(1A) 1.495(4) N(1)-C(8) 1.511(4)

N(1)-C(1) 1.513(4) N(1)-H(1) 0.9100

C(1A)-H(1AA) 0.9600 C(1A)-H(1AB) 0.9600

C(1A)-H(1AC) 0.9600 C(1)-C(2) 1.522(4)

C(1)-H(1A) 0.9700 C(1)-H(1B) 0.9700

C(2)-C(3) 1.572(4) C(2)-H(2A) 0.9700

C(2)-H(2B) 0.9700 C(3)-C(4) 1.538(4)

C(3)-C(1') 1.541(4) C(3)-C(8) 1.560(4)

C(1')-C(6') 1.396(4) C(1')-C(2') 1.398(4)

C(2')-O(2') 1.381(3) C(2')-C(3') 1.383(4)

O(2')-C(2'A) 1.418(4) C(2'A)-H(2'A) 0.9600

C(2'A)-H(2'B) 0.9600 C(2'A)-H(2'C) 0.9600

C(3')-C(4') 1.385(4) C(3')-H(3'A) 0.9300

C(4')-C(5') 1.380(4) C(4')-H(4'A) 0.9300

C(5')-O(5') 1.376(3) C(5')-C(6') 1.392(4)

O(5')-C(5'A) 1.417(5) C(5'A)-H(5'A) 0.9600

C(5'A)-H(5'B) 0.9600 C(5'A)-H(5'C) 0.9600

C(6')-H(6'A) 0.9300 C(4)-C(5) 1.531(4)

C(4)-H(4A) 0.9700 C(4)-H(4B) 0.9700

C(5)-C(6) 1.523(4) C(5)-H(5A) 0.9700

C(5)-H(5B) 0.9700 C(6)-C(7) 1.512(4)

C(6)-H(6A) 0.9700 C(6)-H(6B) 0.9700

C(7)-C(8) 1.532(4) C(7)-Cl(7) 1.814(3)

C(7)-H(7A) 0.9800 C(8)-H(8A) 0.9800

O(1S)-H(1S) 0.90(5) O(1S)-H(2S) 0.87(5)

C(1A)-N(1)-C(8) 114.8(2) C(1A)-N(1)-C(1) 112.3(3)

C(8)-N(1)-C(1) 104.1(2) C(1A)-N(1)-H(1) 108.5

C(8)-N(1)-H(1) 108.5 C(1)-N(1)-H(1) 108.5

N(1)-C(1A)-H(1AA) 109.5 N(1)-C(1A)-H(1AB) 109.5

H(1AA)-C(1A)-H(1AB) 109.5 N(1)-C(1A)-H(1AC) 109.5

H(1AA)-C(1A)-H(1AC) 109.5 H(1AB)-C(1A)-H(1AC) 109.5

N(1)-C(1)-C(2) 105.7(3) N(1)-C(1)-H(1A) 110.6

C(2)-C(1)-H(1A) 110.6 N(1)-C(1)-H(1B) 110.6

C(2)-C(1)-H(1B) 110.6 H(1A)-C(1)-H(1B) 108.7

C(1)-C(2)-C(3) 106.7(3) C(1)-C(2)-H(2A) 110.4

C(3)-C(2)-H(2A) 110.4 C(1)-C(2)-H(2B) 110.4

C(3)-C(2)-H(2B) 110.4 H(2A)-C(2)-H(2B) 108.6

C(4)-C(3)-C(1') 114.0(2) C(4)-C(3)-C(8) 108.8(2)

C(1')-C(3)-C(8) 112.5(2) C(4)-C(3)-C(2) 107.5(2)

C(1')-C(3)-C(2) 110.5(2) C(8)-C(3)-C(2) 102.9(2)

C(6')-C(1')-C(2') 117.4(2) C(6')-C(1')-C(3) 121.0(2)

C(2')-C(1')-C(3) 121.6(2) O(2')-C(2')-C(3') 122.1(3)

O(2')-C(2')-C(1') 116.9(2) C(3')-C(2')-C(1') 121.0(3)

C(2')-O(2')-C(2'A) 118.6(2) O(2')-C(2'A)-H(2'A) 109.5

________________________________________________________________________

**Table 15.** (continued).

________________________________________________________________________

O(2')-C(2'A)-H(2'B) 109.5 H(2'A)-C(2'A)-H(2'B) 109.5

O(2')-C(2'A)-H(2'C) 109.5 H(2'A)-C(2'A)-H(2'C) 109.5

H(2'B)-C(2'A)-H(2'C) 109.5 C(2')-C(3')-C(4') 120.7(3)

C(2')-C(3')-H(3'A) 119.6 C(4')-C(3')-H(3'A) 119.6

C(5')-C(4')-C(3') 119.4(3) C(5')-C(4')-H(4'A) 120.3

C(3')-C(4')-H(4'A) 120.3 O(5')-C(5')-C(4') 115.8(3)

O(5')-C(5')-C(6') 124.3(3) C(4')-C(5')-C(6') 119.9(3)

C(5')-O(5')-C(5'A) 118.2(3) O(5')-C(5'A)-H(5'A) 109.5

O(5')-C(5'A)-H(5'B) 109.5 H(5'A)-C(5'A)-H(5'B) 109.5

O(5')-C(5'A)-H(5'C) 109.5 H(5'A)-C(5'A)-H(5'C) 109.5

H(5'B)-C(5'A)-H(5'C) 109.5 C(5')-C(6')-C(1') 121.6(3)

C(5')-C(6')-H(6'A) 119.2 C(1')-C(6')-H(6'A) 119.2

C(5)-C(4)-C(3) 115.2(2) C(5)-C(4)-H(4A) 108.5

C(3)-C(4)-H(4A) 108.5 C(5)-C(4)-H(4B) 108.5

C(3)-C(4)-H(4B) 108.5 H(4A)-C(4)-H(4B) 107.5

C(6)-C(5)-C(4) 110.2(3) C(6)-C(5)-H(5A) 109.6

C(4)-C(5)-H(5A) 109.6 C(6)-C(5)-H(5B) 109.6

C(4)-C(5)-H(5B) 109.6 H(5A)-C(5)-H(5B) 108.1

C(7)-C(6)-C(5) 111.8(3) C(7)-C(6)-H(6A) 109.3

C(5)-C(6)-H(6A) 109.3 C(7)-C(6)-H(6B) 109.3

C(5)-C(6)-H(6B) 109.3 H(6A)-C(6)-H(6B) 107.9

C(6)-C(7)-C(8) 114.6(2) C(6)-C(7)-Cl(7) 109.8(2)

C(8)-C(7)-Cl(7) 106.3(2) C(6)-C(7)-H(7A) 108.7

C(8)-C(7)-H(7A) 108.7 Cl(7)-C(7)-H(7A) 108.7

N(1)-C(8)-C(7) 111.7(2) N(1)-C(8)-C(3) 103.1(2)

C(7)-C(8)-C(3) 116.5(2) N(1)-C(8)-H(8A) 108.4

C(7)-C(8)-H(8A) 108.4 C(3)-C(8)-H(8A) 108.4

H(1S)-O(1S)-H(2S) 108(4)

________________________________________________________________________

Symmetry transformations used to generate equivalent atoms:

**Table 16.** Anisotropic displacement parameters (Å2 x 103) for **19**. The anisotropic

displacement factor exponent takes the form: -22[ h2 a*2U11 + ... + 2 h k a* b* U12 ].0

______________________________________________________________________________

U11 U22 U33 U23 U13 U12

______________________________________________________________________________

N(1) 47(1) 42(1) 32(1) -2(1) 2(1) 1(1)

C(1A) 65(2) 65(2) 43(2) -2(2) 19(2) -2(2)

C(1) 66(2) 45(2) 43(2) -10(2) 1(1) -6(2)

C(2) 54(2) 38(2) 44(2) -5(1) -4(1) -8(2)

C(3) 36(1) 32(1) 34(1) 1(1) -2(1) -1(1)

C(1') 37(1) 30(1) 37(1) 3(1) 0(1) -4(1)

C(2') 43(2) 34(2) 45(2) 3(1) 6(1) 2(1)

O(2') 62(1) 49(2) 50(1) 7(1) 13(1) 23(1)

C(2'A) 46(2) 49(2) 69(2) -5(2) 10(2) 7(2)

C(3') 48(2) 50(2) 50(2) 12(2) 2(1) 13(2)

C(4') 52(2) 55(2) 40(2) 14(1) -1(1) 4(2)

C(5') 42(1) 38(2) 37(1) 2(1) 4(1) -8(1)

O(5') 54(1) 60(1) 42(1) 2(1) 11(1) 2(1)

C(5'A) 59(2) 75(3) 56(2) -3(2) 16(2) 12(2)

C(6') 36(1) 30(2) 43(2) 2(1) 1(1) -2(1)

C(4) 34(1) 42(2) 40(2) 5(1) -3(1) 0(1)

C(5) 44(2) 36(2) 51(2) 3(1) 1(1) 10(1)

C(6) 54(2) 32(2) 44(2) 3(1) -3(1) -1(1)

C(7) 39(1) 39(2) 32(1) 2(1) 0(1) -8(1)

Cl(7) 45(1) 51(1) 36(1) -4(1) -4(1) -5(1)

C(8) 35(1) 37(2) 29(1) -1(1) 0(1) 2(1)

Cl(2) 98(1) 69(1) 56(1) -3(1) -7(1) -1(1)

O(1S) 74(2) 71(2) 57(1) 0(2) -16(1) 4(2)

______________________________________________________________________________

**Table 17.** Hydrogen coordinates ( x 104) and isotropic displacement parameters (Å2 x 103)

for **19**.

______________________________________________________________________________

x y z U(eq)

______________________________________________________________________________

H(1) 11023 6249 4003 44

H(1AA) 7679 5638 4211 86

H(1AB) 7151 7502 4145 86

H(1AC) 8545 6861 4842 86

H(1A) 11788 8738 4438 62

H(1B) 9850 9490 3990 62

H(2A) 13671 8972 3418 55

H(2B) 11900 10069 3049 55

H(2'A) 6068 11052 2609 82

H(2'B) 5815 10177 1806 82

H(2'C) 7021 11830 1881 82

H(3'A) 8416 10943 872 59

H(4'A) 10463 10168 -119 59

H(5'A) 15913 7161 -429 95

H(5'B) 14842 6260 241 95

H(5'C) 16139 7841 416 95

H(6'A) 13618 7206 1344 43

H(4A) 14572 6777 2459 46

H(4B) 13828 6208 3261 46

H(5A) 12526 4778 1830 52

H(5B) 14027 3944 2447 52

H(6A) 10646 2922 2531 52

H(6B) 11422 3729 3313 52

H(7A) 8154 4656 3066 44

H(8A) 8517 7541 2825 40

H(1S) 13740(70) 4420(60) 4480(30) 81

H(2S) 13380(70) 5700(70) 5020(30) 81

______________________________________________________________________________

**Table 18.** Torsion angles [°] for **19**.

________________________________________________________________________

C(1A)-N(1)-C(1)-C(2) -158.8(3) C(8)-N(1)-C(1)-C(2) -34.0(3)

N(1)-C(1)-C(2)-C(3) 12.0(3) C(1)-C(2)-C(3)-C(4) -101.2(3)

C(1)-C(2)-C(3)-C(1') 133.8(3) C(1)-C(2)-C(3)-C(8) 13.5(3)

C(4)-C(3)-C(1')-C(6') -4.4(4) C(8)-C(3)-C(1')-C(6') -128.8(3)

C(2)-C(3)-C(1')-C(6') 116.9(3) C(4)-C(3)-C(1')-C(2') 178.6(3)

C(8)-C(3)-C(1')-C(2') 54.1(4) C(2)-C(3)-C(1')-C(2') -60.2(3)

C(6')-C(1')-C(2')-O(2') -177.0(3) C(3)-C(1')-C(2')-O(2') 0.1(4)

C(6')-C(1')-C(2')-C(3') 1.2(4) C(3)-C(1')-C(2')-C(3') 178.4(3)

C(3')-C(2')-O(2')-C(2'A) 15.3(5) C(1')-C(2')-O(2')-C(2'A) -166.5(3)

O(2')-C(2')-C(3')-C(4') 178.5(3) C(1')-C(2')-C(3')-C(4') 0.3(5)

C(2')-C(3')-C(4')-C(5') -1.6(5) C(3')-C(4')-C(5')-O(5') -178.2(3)

C(3')-C(4')-C(5')-C(6') 1.4(5) C(4')-C(5')-O(5')-C(5'A) 172.5(3)

C(6')-C(5')-O(5')-C(5'A) -7.1(5) O(5')-C(5')-C(6')-C(1') 179.8(3)

C(4')-C(5')-C(6')-C(1') 0.2(4) C(2')-C(1')-C(6')-C(5') -1.5(4)

C(3)-C(1')-C(6')-C(5') -178.7(3) C(1')-C(3)-C(4)-C(5) -75.8(3)

C(8)-C(3)-C(4)-C(5) 50.5(3) C(2)-C(3)-C(4)-C(5) 161.3(2)

C(3)-C(4)-C(5)-C(6) -58.4(3) C(4)-C(5)-C(6)-C(7) 55.3(3)

C(5)-C(6)-C(7)-C(8) -49.4(3) C(5)-C(6)-C(7)-Cl(7) 70.2(3)

C(1A)-N(1)-C(8)-C(7) -68.6(3) C(1)-N(1)-C(8)-C(7) 168.3(2)

C(1A)-N(1)-C(8)-C(3) 165.6(3) C(1)-N(1)-C(8)-C(3) 42.5(3)

C(6)-C(7)-C(8)-N(1) -73.7(3) Cl(7)-C(7)-C(8)-N(1) 164.80(17)

C(6)-C(7)-C(8)-C(3) 44.3(3) Cl(7)-C(7)-C(8)-C(3) -77.1(2)

C(4)-C(3)-C(8)-N(1) 79.8(3) C(1')-C(3)-C(8)-N(1) -153.0(2)

C(2)-C(3)-C(8)-N(1) -34.1(3) C(4)-C(3)-C(8)-C(7) -42.9(3)

C(1')-C(3)-C(8)-C(7) 84.4(3) C(2)-C(3)-C(8)-C(7) -156.7(2)

________________________________________________________________________
